# Supplementary material for: Validation experiments on finite element models of an ostrich (Struthio camelus) cranium
Source: PubMed Central journal article supplement (PMC4614885; doi:10.7717/peerj.1294), 2015-10-13

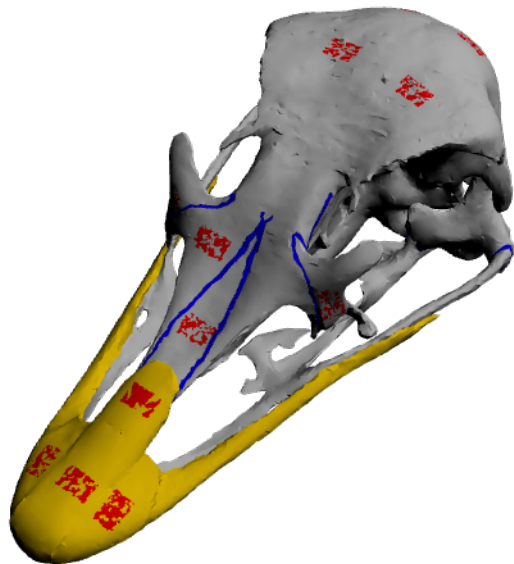

Supplement: peerj-03-1294-s001.pdf [file peerj-03-1294-s001.pdf]
